# Supplementary material for: MLL1 Inhibition Enhances the Differentiation Potential of Bovine Embryonic Stem Cells by Increasing H3K4 Mono-Methylation at Active Promoters
Source: Preprints.org preprint supplement (doi:10.20944/preprints202306.1441.v1), 2023-06-20
Supplement: Supplementary file 1 [file supplementary]

# MLL1 inhibition enhances the differentiation potential of bovine embryonic stem cells by increasing H3K4 mono-methylation at active promoters

Chen Li<sup>1</sup>, Xuejie Han<sup>1</sup>, Jing Wang<sup>1</sup>, Fang Liu<sup>1</sup>, Yuanyuan Zhang<sup>1</sup>, Zihong Li<sup>1</sup>,  
Zhenyu Lu<sup>1</sup>, Yongli Yue<sup>1</sup>, Jinzhu Xiang<sup>1</sup>, and Xueling Li<sup>1\*</sup>

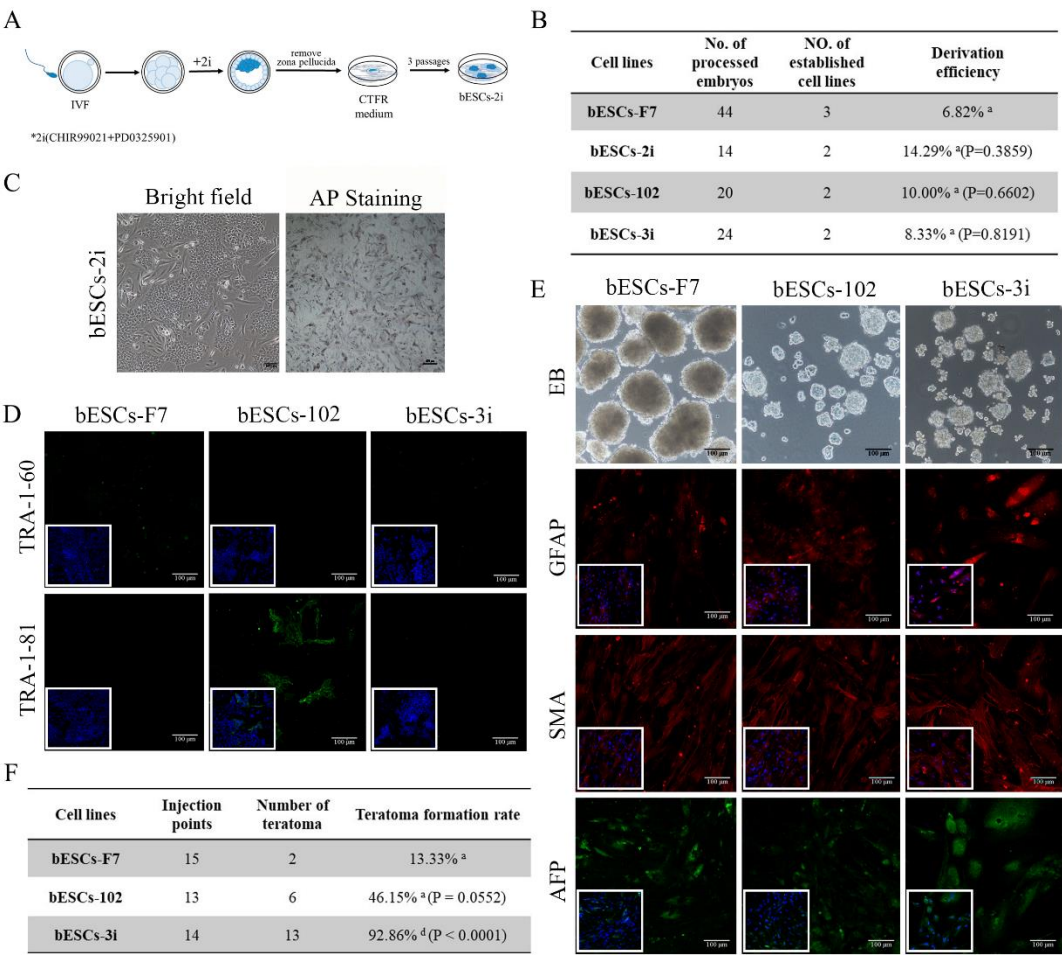

**Supplementary Figure 1. Establishment of bESCs from bovine blastocysts treated with different combination of inhibitors and comparison of pluripotency and differentiation ability of derived bESCs.**

(A) Schematic diagram of established bESCs-2i. (B) Comparison of bESCs generation rates of bESCs-F7, bESCs-2i, bESCs-102 and bESCs-3i. P values of the blastocyst rate were determined by the chi-squared test with Yates' correction, with the bESCs-F7 group as control. Values in the same column with the same letters (a, a) indicate no significant difference ( $P > 0.05$ ). (C) The morphology and alkaline phosphatase staining of bESCs-2i (Scale bar, 200  $\mu\text{m}$ ). (D) IF of pluripotency transcription factors TRA-1-60 and TRA-1-81 of bESCs-F7, bESCs-102 and bESCs-3i (Scale bar, 100  $\mu\text{m}$ ). (E) bESCs-F7, bESCs-102 and bESCs-3i spontaneously differentiate into EBs *in vitro* (Scale bar, 100  $\mu\text{m}$ ). IF staining is performed after differentiation. GFAP (ectoderm), SMA (mesoderm) and AFP (endoderm) (Scale bar, 200  $\mu\text{m}$ ). (F) Comparison of teratomas formation rates of bESCs-F7, bESCs-102 and bESCs-3i. P values of the blastocyst rate were determined by the chi-squared test with Yates' correction, with the bESCs-F7 group as control. Values in the same column with the same letters (a, a) indicate no significant difference ( $P > 0.05$ ).

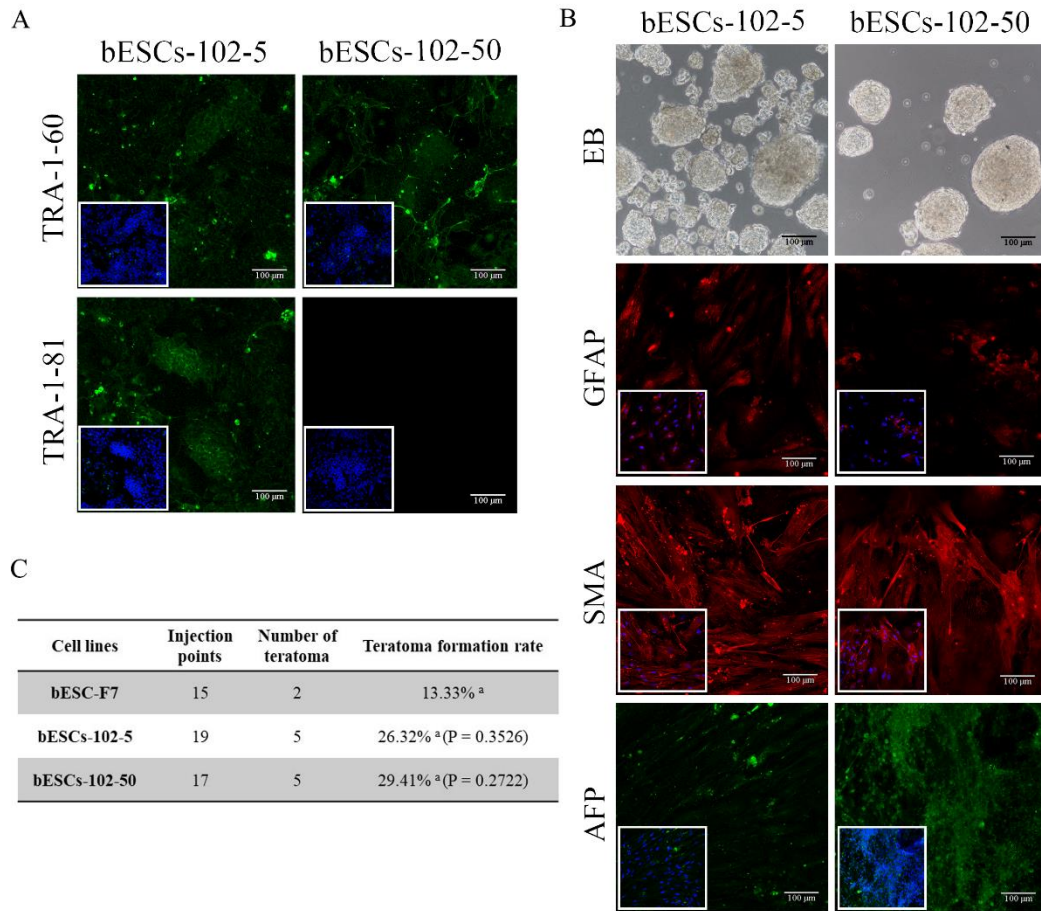

**Supplementary Figure 2. The pluripotency and differentiation ability of bESCs after MLL1 inhibition.**

(A) IF of pluripotency transcription factors TRA-1-60 and TRA-1-81 of bESCs-102-5 and bESCs-102-50 (Scale bar, 100  $\mu$ m). (B) bESCs-F7, bESCs-102-5 and bESCs-102-50 spontaneously differentiate into EBs in vitro (Scale bar, 100  $\mu$ m). IF staining is performed after differentiation. GFAP (ectoderm), SMA (mesoderm) and AFP (endoderm) (Scale bar, 200  $\mu$ m). (C) Comparison of teratomas formation rates of bESCs-F7, bESCs-102 and bESCs-3i. P values of the blastocyst rate were determined by the chi-squared test with Yates' correction, with the bESCs-F7 group as control.

Values in the same column with same letters (a, a) indicate not significantly difference ( $P > 0.05$ ).

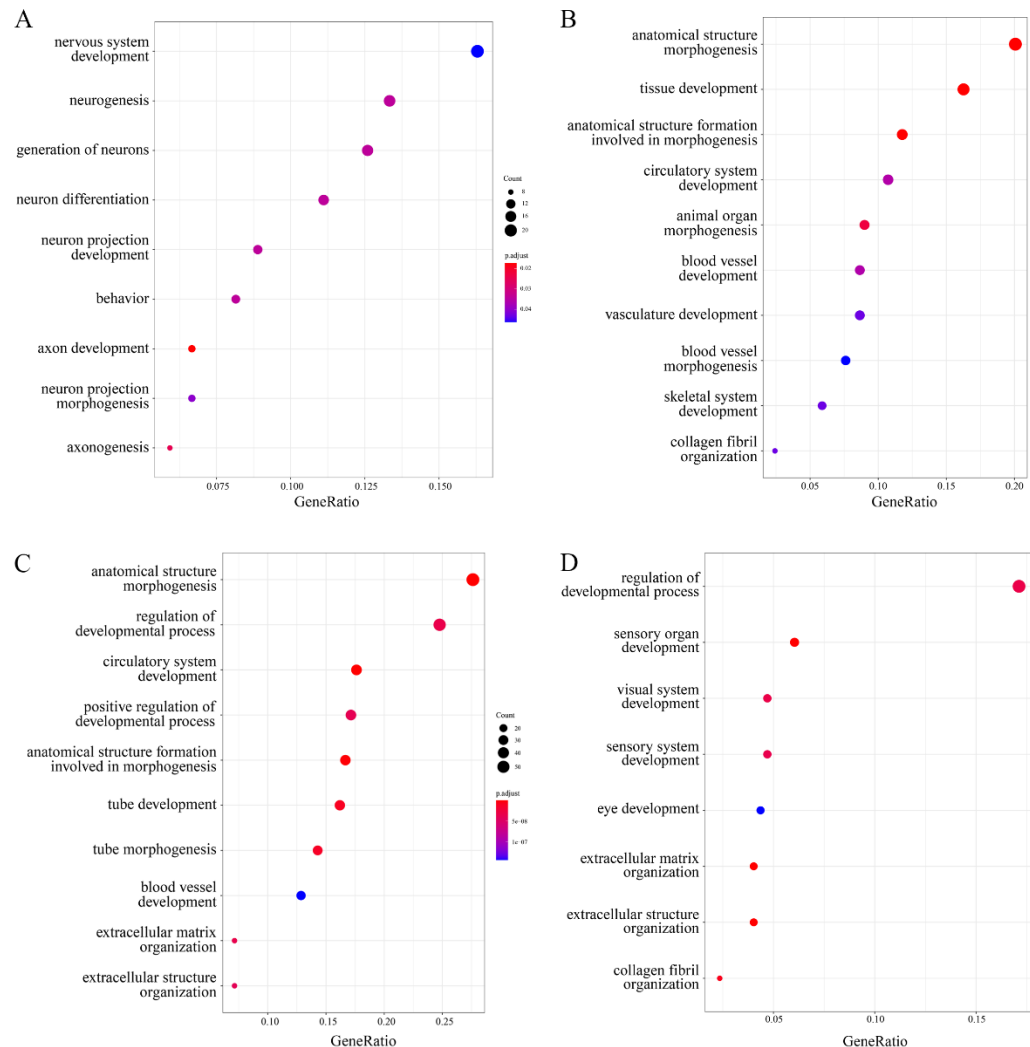

### Supplementary Figure 3. GO biological process analyses of bESCs

(A) GO biological process terms of differentially expressed genes between bESCs-F7 and bESCs-102. Up-regulated genes in bESCs-102. (B) GO biological process terms of differentially expressed genes between bESCs-F7 and bESCs-102. Down-regulated genes in bESCs-102. (C) GO biological process terms of differentially expressed genes between bESCs-F7 and bESCs-3i. Down-regulated genes in bESCs-3i. (D) GO biological process terms of differentially expressed genes between bESCs-F7 and

## bESCs-102-5. Down-regulated genes in bESCs-102-5.

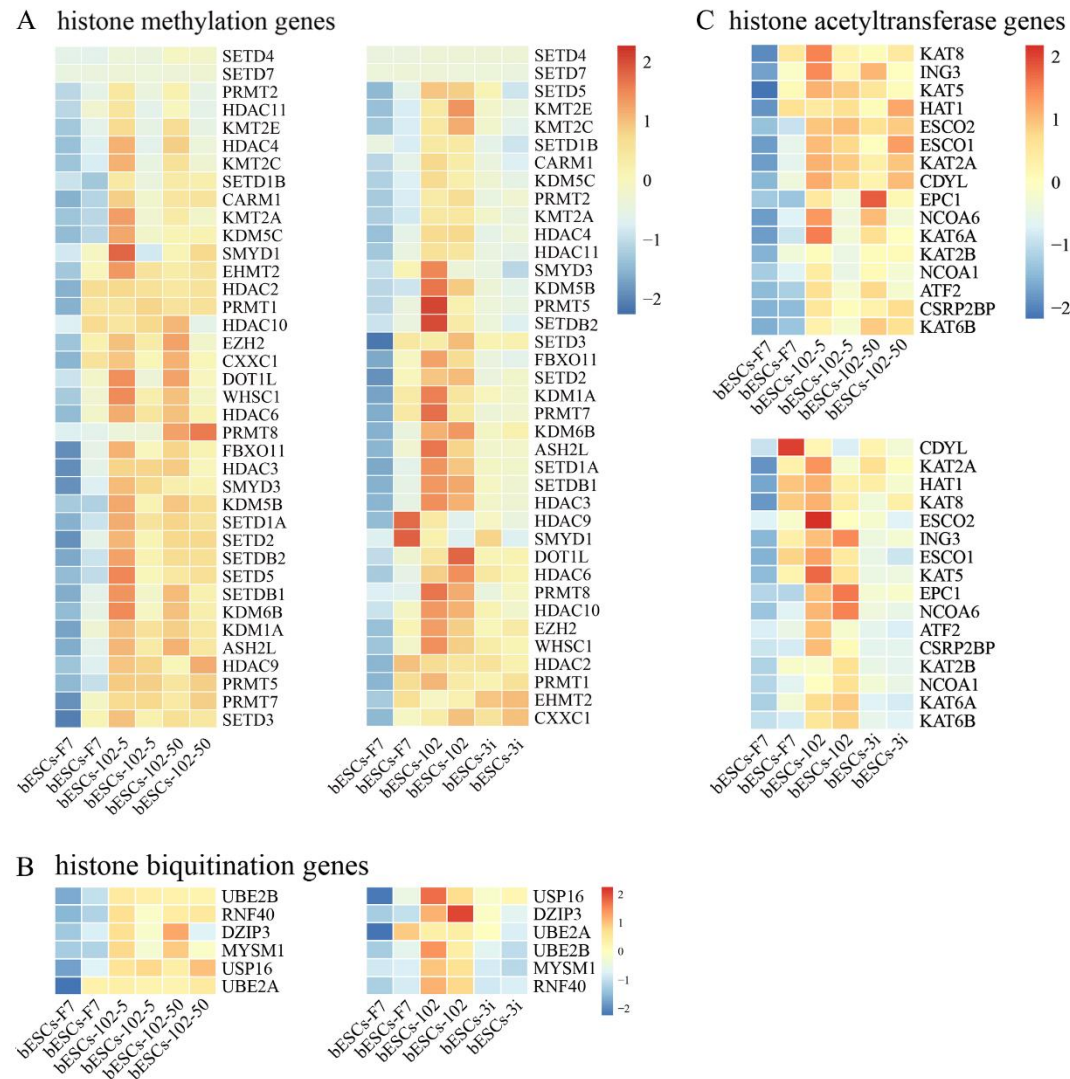

**Supplementary Figure 4. MLL1 inhibition up-regulates the expression of regulatory genes associated with epigenetic modification.**

(A) Heat map of histone methylation genes in bESCs. RNA-seq was performed. RPKM values were used to define up-regulated expressed genes ( $\text{RPKM} \geq 1$ , red) and down-regulated expressed genes ( $\text{RPKM} < 1$ , blue). (B) Heat map of histone ubiquitination genes in bESCs. RNA-seq was performed. RPKM values were used to define up-regulated expressed genes ( $\text{RPKM} \geq 1$ , red) and down-regulated expressed



genes (RPKM <1, blue). (C) Heat map of histone acetyltransferase genes in bESCs.

RNA-seq was performed. RPKM values were used to define up-regulated expressed genes (RPKM ≥1, red) and down-regulated expressed genes (RPKM <1, blue).

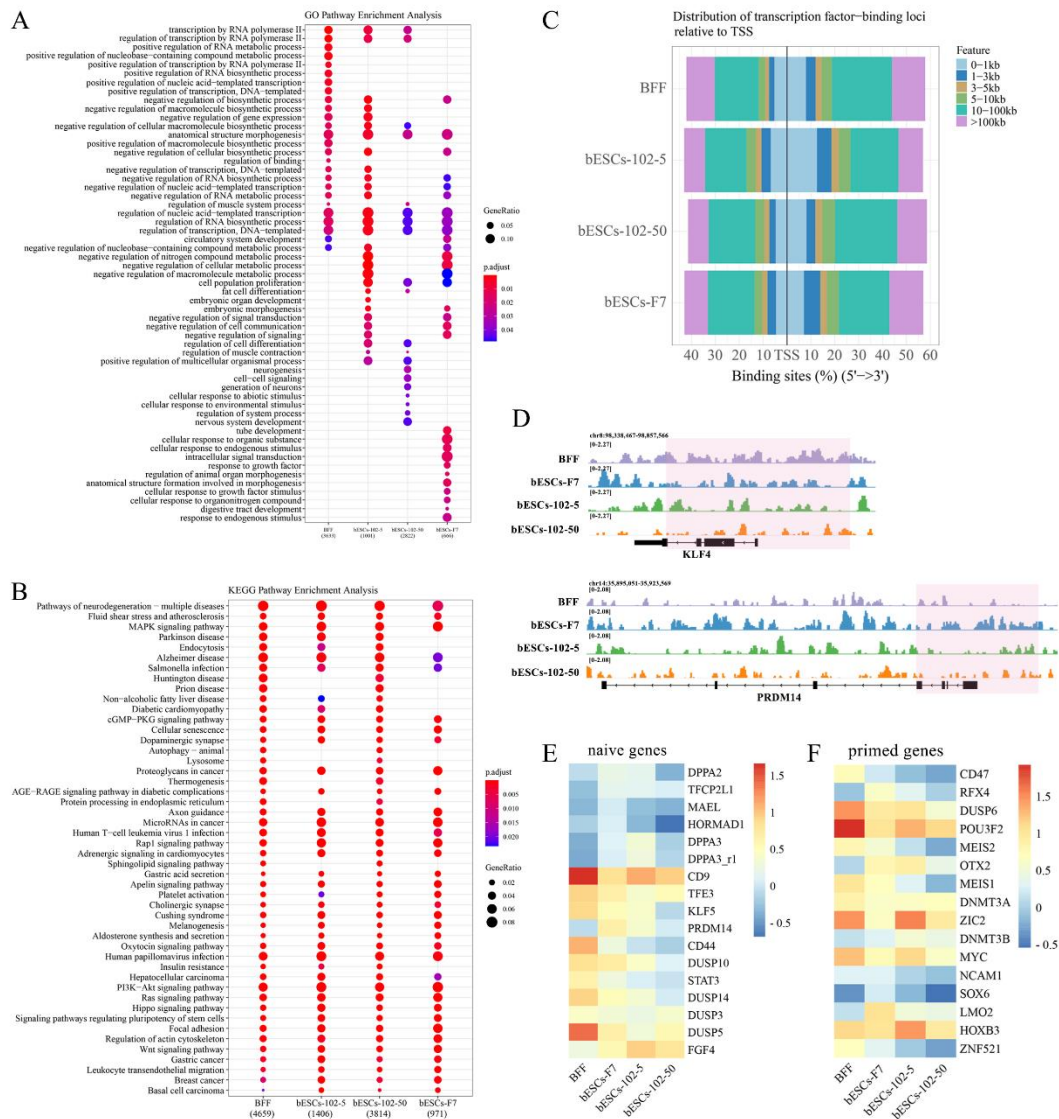

**Supplementary Figure 5. MLL1 inhibition changes the H3K4me1 distribution of bESCs-F7.**

(A) GO biological process terms of H3K4me1 ChIP-seq of bESCs-F7, bESCs-102-5, bESCs-102-50 and BFF. (B) KEGG of H3K4me1 ChIP-seq of bESCs-F7, bESCs-102-5, bESCs-102-50 and BFF. (C) Ratios of bESCs-F7, bESCs-102-5, bESCs-102-50 and BFF gene regions based on H3K4me1 ChIP-seq. (D) Peak map of H3K4me1 enrichment in genes of KLF4 and PRDM14 of bESCs-F7, bESCs-102-5 and bESCs-102-50 promoter sites (pink regions) comparison. (E) H3K4me1 ChIP-seq analysis of naïve pluripotency markers. RPKM values were used to define up-regulated expressed genes ( $\text{RPKM} \geq 1$ , red) and down-regulated expressed genes ( $\text{RPKM} < 1$ , blue). (F) H3K4me1 ChIP-seq analysis of primed pluripotency markers. RPKM values were used to define up-regulated expressed genes ( $\text{RPKM} \geq 1$ , red) and down-regulated expressed genes ( $\text{RPKM} < 1$ , blue).

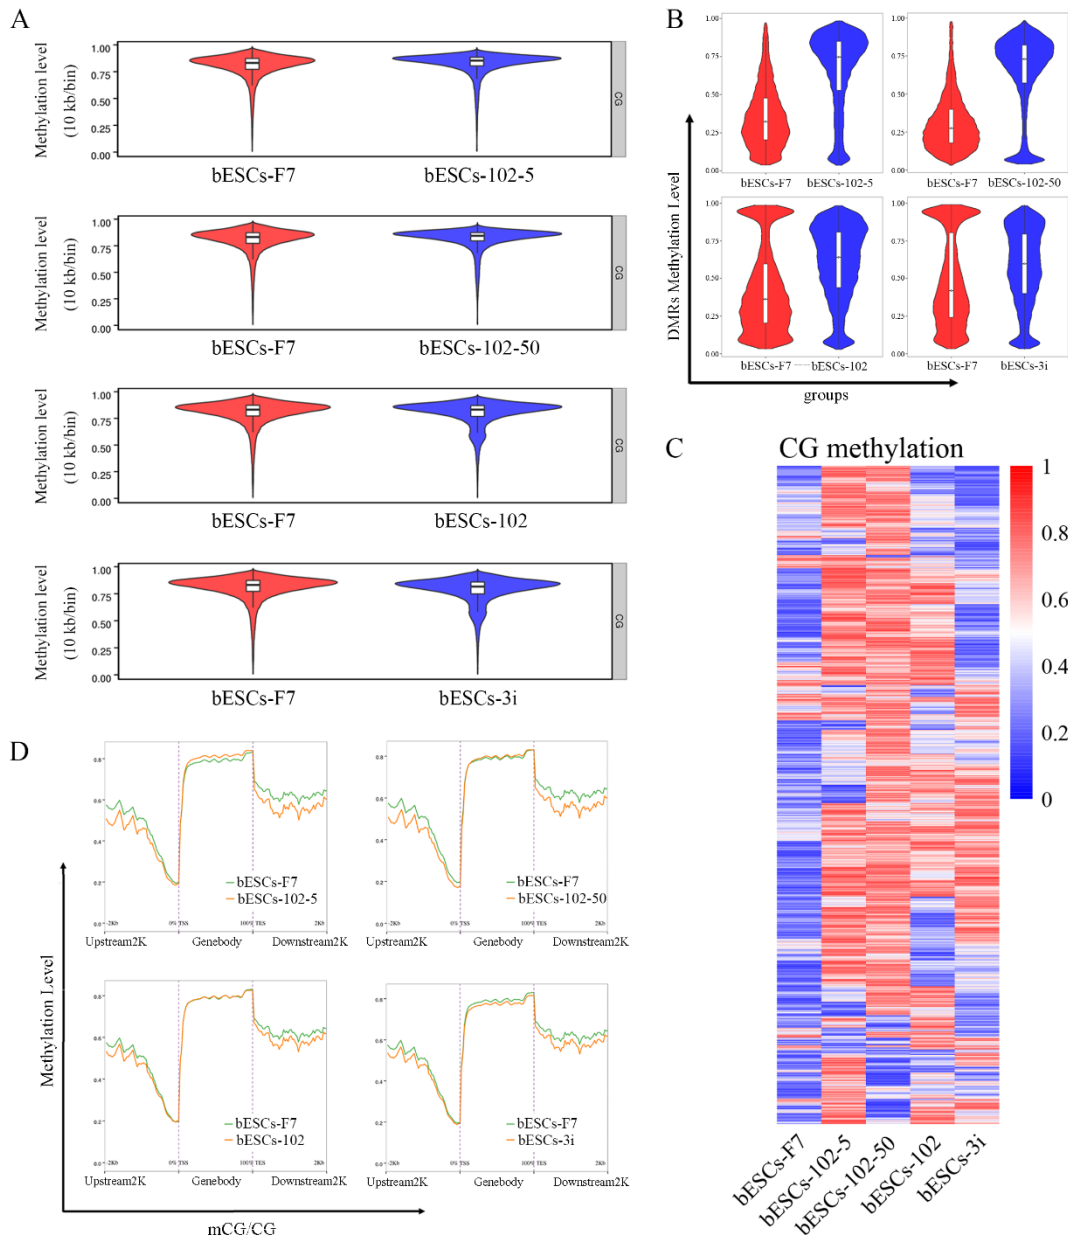

**Supplementary Figure 6. Differences of DNA methylation distribution of bESCs cell lines.**

(A) Genome-wide horizontal distribution of methylation sites in of bESCs-F7, bESCs-102-5 and bESCs-102-50, bESCs-102 and bESCs-3i, with 10Kb as a bin, the width of each violin represents how much bin is at that methylation level. (B) CG DMR methylation horizontal distribution of bESCs-F7, bESCs-102-5 and bESCs-102-50, bESCs-102 and bESCs-3i. (C) Heat map of mCG of bESCs-F7,



bESCs-102-5 and bESCs-102-50, bESCs-102 and bESCs-3i. DNA methylation sequencing analysis was performed. RPKM values were used to define up-regulated expressed genes ( $\text{RPKM} \geq 0.5$ , red) and down-regulated expressed genes ( $\text{RPKM} < 0.5$ , blue). (D) The methylation level of bESCs-F7, bESCs-102-5 and bESCs-102-50, bESCs-102 and bESCs-3i was 2K in the upstream and downstream of Genebody.

**Supplementary table 1 Primers of qRT-PCR**

| Genes          | upstream primer        | downstream primer    |
|----------------|------------------------|----------------------|
| <i>GAPDH</i>   | GGGTCATCATCTCTGCACCT   | GGTCATAAGTCCCTCCACGA |
| <i>OCT4</i>    | GGTTCTCTTTGGAAAGGTGTTC | ACACTCGGACCACGTCTTTC |
| <i>SOX2</i>    | CATCCACAGCAAATGACAGC   | TTTCTGCAAAGCTCCTACCG |
| <i>NANOG</i>   | TTCCCTCCTCCATGGATCTG   | ATTTGCTGGAGACTGAGGTA |
| <i>NCAM1</i>   | AGAAGCAAGAGACCCTGGAC   | AGAAGCAAGAGACCCTGGAC |
| <i>TET1</i>    | AGAATGTCTGGCTTGGGAAGA  | TGGCTTCCATTCTTCCCTT  |
| <i>TET3</i>    | GGAAGCGGTGTGGTACTTGT   | GCTGAGCTCTGAGCCTGTCT |
| <i>MEIS-1</i>  | TGCAGGCAGTGTCTTAAGGA   | CATGACCGATGCTTTGCTCA |
| <i>FGF4</i>    | TACGGCTCGCCTTTCTTCAC   | TTCTTGGCCTTGCCGTTCTT |
| <i>GATA6</i>   | GCACCAGTATGGCTCGCT     | CTCCAGCAGGTCTGTGCC   |
| <i>C-MYC</i>   | CCCATCAGCACAAATTACGCA  | TGTCCGCCTCTTGTCATTCT |
| <i>KLF4</i>    | TCCCACCGCTCCATTAC      | ATGAGAACTCTTCGTGTAGG |
| <i>REX1</i>    | GGAAGAGGACCCACTCCTTC   | ACTTGGCCTCCTAGTGCATC |
| <i>TEAD4</i>   | ACTGGATCCAACAGGTGAGG   | ATGTCAGAAGGGGTCAAACG |
| <i>STELLA</i>  | TGCAAGTTGCCACTCAACTC   | TTCCTTTGGCATAGCGAAGT |
| <i>CD9</i>     | TTGGACTATGGCTCCGATTC   | TGGCTGCAGCTACTTCAATG |
| <i>BCL2</i>    | GATGACTTCTCTCGGCGCTA   | GACCCCTCCGAACTCAAAGA |
| <i>TFCP2L1</i> | GTGCAGATCGACACCTTCAA   | GGGAGCACTCTGAGAGGATG |
| <i>HOXA9</i>   | CATCACCACCACCCCTATGT   | GCGGTTCAAGTTTAATGCCA |
| <i>MLL1</i>    | TGGAGCAGTCACCACAGAAG   | TCACACCTGCAAATGAGAGC |
| <i>PDRM14</i>  | CGGAGACAATTCCCTGATGT   | CACGGGAATGTCCAGAAACT |
| <i>DNMT3A</i>  | CTGGTGCTGAAGGACTTGGGC  | CAGAAGAAGGGGCGGTCATC |
| <i>DNMT3B</i>  | CCGCAGATCAAGCTCAC      | GTTATTTTCGGGTTCGGAC  |
| <i>DNMT3L</i>  | ATGAGCAACTGGGTCTGCTT   | GGGCTCTCTCTTCCACACAG |
| <i>DNMT1</i>   | AGTGGGGGACTGTGTTTCTG   | TGTACGAGAGCTGCATGTCC |

**Supplementary table 2 Primer sets for BSP methylation assay**

| Genes        | upstream primer               | downstream primer            |
|--------------|-------------------------------|------------------------------|
| <i>OCT4</i>  | GGTGTGAGTAGTTTTTAGGAGAT<br>TT | AAACCATCCCTCCACACAAATCA<br>T |
| <i>NANOG</i> | GAAGGGATTGAAGGTTATTTGTT       | ACACACCTTAAATAAACAAACC       |
